# Supplementary material for: Risk-Stratified Breast Cancer Screening Incorporating a Polygenic Risk Score: A Survey of UK General Practitioners’ Knowledge and Attitudes
Source: MDPI journal article supplement (doi:10.3390/genes14030732), 2023-03-16
Supplement: s1 [file s1]

## Supplementary Data

### Supplementary Material Text S1. A copy of the online survey

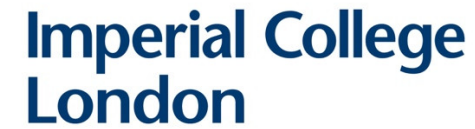

#### **Participant Information**

**An anonymous survey of UK GPs' knowledge and attitudes towards the use of polygenic risk scores in breast cancer screening**

**Researcher: Dr Aya Ayoub, MSc Genomic Medicine student, Imperial College London [aya.ayoub20@imperial.ac.uk](mailto:aya.ayoub20@imperial.ac.uk)**

*As a qualified GP or GP trainee practicing in the UK, you are invited to complete this questionnaire which forms part of my MSc Genomic Medicine at Imperial College London. The aim of this questionnaire is to assess UK GPs' knowledge and attitudes towards polygenic risk scores (PRS) for risk stratification in breast cancer screening.*

#### ***What is the purpose of this study?***

*PRS quantifies the cumulative effects of multiple common genetic variants - single nucleotide polymorphisms, 'SNPs' - which individually have a low effect on disease susceptibility but, when combined, have been shown to substantially increase an individual's risk of developing breast cancer.*

*Use of PRS to predict risk of future breast cancer is currently being evaluated within the NHS through the 'CanRisk' online risk-assessment tool. 'CanRisk' offers a personalised breast cancer risk assessment by combining a PRS for 313 SNPs (validated in women of white European ancestry only) with testing for rarer high-impact pathogenic variants in cancer predisposing genes (e.g. *BRCA1*) and non-genetic factors including family history, mammographic density, lifestyle and hormonal risk factors.*

#### ***Why have I been invited?***

*You have been invited because you are a UK trainee or qualified GP. In the future PRS could be offered beyond specialist genetics clinics, and potentially incorporated into the UK national breast screening programme which currently offers 3-yearly mammographic screening to all women aged 50 – 71 years regardless of individual risk. Using PRS to risk-stratify individuals for future breast cancer could offer a more targeted approach to screening with the potential to reduce mortality in high-risk groups, reduce overdiagnosis and improve the cost-effectiveness of screening.*

*One of the many challenges to future PRS implementation is workforce attitudes and training. Patients being offered testing will particularly look to their GP for information and advice.*

***Do I have to take part?***

*This questionnaire should take no more than 10 minutes to complete. Participation is voluntary and responses are anonymous. Prior to submission, you are free to withdraw from the questionnaire at any time, without giving any reason.*

***What are the possible disadvantages and risks of taking part?***

*This is an online survey, therefore there are no disadvantages or risks associated with participation in this study.*

***What are the possible benefits of taking part***

*Results of the survey will be used to evaluate GPs' level of confidence with genomic concepts underpinning PRS which is necessary to understand and communicate the potential benefits and harms of testing to patients.*

***What will happen to the results of the research study?***

*Results of the survey will be evaluated as part of the researcher's MSc project, and may be published in a scientific journal following this. The survey is anonymised so participants will not be identified in any report/publication.*

***Who is organising and funding the research?***

*Imperial College London is the study sponsor. This study is unfunded.*

***Who has reviewed the study?***

*This study was given approval by the Head of Department and Research Governance Integrity Team (RGIT) at Imperial College London.*

***Contact for Further Information***

*Please contact the researcher for any queries or complaints: Dr Aya Ayoub, [aya.ayoub20@imperial.ac.uk](mailto:aya.ayoub20@imperial.ac.uk)*

*Thank you for taking part in this study!*

A copy of the written information can be printed online for you to keep.

Please tick the box if you agree to take part in this anonymous study

- ☐ I consent to take part in this study

1. Where are you in your GP career?

- ☐ GP Trainee
- ☐ Less than 5 years post-CCT
- ☐ 5-9 years post-CCT
- ☐ 10-14 years post-CCT
- ☐ 15-19 years post-CCT
- ☐ 20-24 years post-CCT
- ☐ 25+ years post-CCT

2. Which term most closely describes your role?

- ☐ Trainee GP
- ☐ Salaried GP
- ☐ GP Partner
- ☐ Locum GP
- ☐ Other (please specify)

3. Where do you work in the UK?

- ☐ East of England
- ☐ East Midlands
- ☐ London
- ☐ North East
- ☐ North West
- ☐ Northern Ireland
- ☐ Scotland
- ☐ South East

- South West
- Wales
- West Midlands
- Yorkshire and The Humber

4. What is your gender?

- Male
- Female
- Non-binary / Other
- Prefer not to say

5. Which ethnicity best describes you?

- **Asian or Asian British**
  - Indian
  - Pakistani
  - Bangladeshi
  - Chinese
  - Any other Asian background
- **Black, Black British, Caribbean or African**
  - Caribbean
  - African
  - Any other Black, Black British, or Caribbean background
- **Mixed or multiple ethnic groups**
  - White and Black Caribbean
  - White and Black African
  - White and Asian
  - Any other Mixed or multiple ethnic background

- **White**
  - English, Welsh, Scottish, Northern Irish or British
  - Irish
  - Gypsy or Irish Traveller
  - Roma
  - Any other White background

- **Other ethnic group**
  - Arab
  - Any other ethnic group

- **Prefer not to say**

6. How strongly do you agree or disagree that the current UK National Breast Screening programme, which offers 3-yearly mammograms to all women aged 50-71 years old, is an effective method for early detection of breast cancer?

- Strongly agree
- Somewhat agree
- Neither agree nor disagree
- Somewhat disagree
- Strongly disagree

7. Using the sliding scale below, please rate your level of familiarity with PRS.

Not familiar                      Slightly familiar                      Moderately familiar                      Very familiar                      Extremely familiar

0                      1                      2                      3                      4                      5                      6                      7

8. PRS provides a measure of the inheritance of many low-impact disease-associated SNPs that have been shown to correlate with - rather than cause - disease through large studies, 'genome wide association studies', that compare the genomes of patients with disease to those of healthy controls. On the other hand, high impact variants in - monogenic - cancer predisposing genes (e.g. *BRCA1*) are shown to cause disease by altering a gene's function, and have a clear mode of inheritance (e.g. autosomal dominant). Using the sliding scale below, please rate your level of confidence explaining the difference between a polygenic and monogenic condition to a patient.

|  |               |                    |                      |                |                     |   |
|--|---------------|--------------------|----------------------|----------------|---------------------|---|
|  | Not confident | Slightly confident | Moderately confident | Very confident | Extremely confident |   |
|  | 0             | 1                  | 2                    | 3              | 4                   | 5 |

9. Using the sliding scale below, please rate how confident you feel counselling a patient on the advantages and disadvantages of a personalised breast cancer risk assessment incorporating PRS?

|  |               |                    |                      |                |                     |   |
|--|---------------|--------------------|----------------------|----------------|---------------------|---|
|  | Not confident | Slightly confident | Moderately confident | Very confident | Extremely confident |   |
|  | 0             | 1                  | 2                    | 3              | 4                   | 5 |

10. A personalised breast cancer risk assessment aims to offer a more targeted screening approach based on individual risk. Please indicate how strongly you agree or disagree with the following recommendations:

|                                                                                      |                                                                                       |                                                                                       |                                                                                       |                                                                                       |                                                                                       |
|--------------------------------------------------------------------------------------|---------------------------------------------------------------------------------------|---------------------------------------------------------------------------------------|---------------------------------------------------------------------------------------|---------------------------------------------------------------------------------------|---------------------------------------------------------------------------------------|
|                                                                                      | Strongly disagree                                                                     | Somewhat disagree                                                                     | Neither agree nor disagree                                                            | Somewhat agree                                                                        | Strongly agree                                                                        |
|                                                                                      | For women who are at high risk of breast cancer , start screening at an earlier age   | For women who are at high risk of breast cancer , start screening at an earlier age   | For women who are at high risk of breast cancer , start screening at an earlier age   | For women who are at high risk of breast cancer , start screening at an earlier age   | For women who are at high risk of breast cancer , start screening at an earlier age   |
| For women who are at high risk of breast cancer, start screening at an earlier age   | Strongly disagree                                                                     | Somewhat disagree                                                                     | Neither agree nor disagree                                                            | Somewhat agree                                                                        | Strongly agree                                                                        |
|                                                                                      | For women who are at high risk of breast cancer , increase the frequency of screening | For women who are at high risk of breast cancer , increase the frequency of screening | For women who are at high risk of breast cancer , increase the frequency of screening | For women who are at high risk of breast cancer , increase the frequency of screening | For women who are at high risk of breast cancer , increase the frequency of screening |
| For women who are at high risk of breast cancer, increase the frequency of screening | Strongly disagree                                                                     | Somewhat disagree                                                                     | Neither agree nor disagree                                                            | Somewhat agree                                                                        | Strongly agree                                                                        |

A personalised breast cancer risk assessment aims to offer a more targeted screening approach based on individual risk. Please indicate how strongly you agree or disagree with the following recommendations:

|                                                                                                                                        | Strongly disagree                                                                                                                                   | Somewhat disagree                                                                                                                                   | Neither agree nor disagree                                                                                                                                   | Somewhat agree                                                                                                                                   | Strongly agree                                                                                                                                   |
|----------------------------------------------------------------------------------------------------------------------------------------|-----------------------------------------------------------------------------------------------------------------------------------------------------|-----------------------------------------------------------------------------------------------------------------------------------------------------|--------------------------------------------------------------------------------------------------------------------------------------------------------------|--------------------------------------------------------------------------------------------------------------------------------------------------|--------------------------------------------------------------------------------------------------------------------------------------------------|
|                                                                                                                                        | For women who are at high risk                                                                                                                      | For women who are at high risk                                                                                                                      | For women who are at high risk                                                                                                                               | For women who are at high risk                                                                                                                   | For women who are at high risk                                                                                                                   |
| <b>For women who are at high risk of breast cancer, increase the frequency of screening and start at an earlier age</b>                | of breast cancer , increase the frequency of screening and start at an earlier age Strongly disagree                                                | of breast cancer , increase the frequency of screening and start at an earlier age Somewhat disagree                                                | of breast cancer , increase the frequency of screening and start at an earlier age Neither agree nor disagree                                                | of breast cancer , increase the frequency of screening and start at an earlier age Somewhat agree                                                | of breast cancer , increase the frequency of screening and start at an earlier age Strongly agree                                                |
|                                                                                                                                        |                                                                                                                                                     | For women who are at higher than average risk of breast cancer , increase the frequency of screening Somewhat disagree                              | For women who are at higher than average risk of breast cancer , increase the frequency of screening Neither agree nor disagree                              | For women who are at higher than average risk of breast cancer , increase the frequency of screening Somewhat agree                              | For women who are at higher than average risk of breast cancer , increase the frequency of screening Strongly agree                              |
| <b>For women who are at higher than average risk of breast cancer, increase the frequency of screening</b>                             |                                                                                                                                                     |                                                                                                                                                     |                                                                                                                                                              |                                                                                                                                                  |                                                                                                                                                  |
|                                                                                                                                        | For women who are at higher than average risk of breast cancer r, increase the frequency of screening and start at an earlier age Strongly disagree | For women who are at higher than average risk of breast cancer r, increase the frequency of screening and start at an earlier age Somewhat disagree | For women who are at higher than average risk of breast cancer r, increase the frequency of screening and start at an earlier age Neither agree nor disagree | For women who are at higher than average risk of breast cancer r, increase the frequency of screening and start at an earlier age Somewhat agree | For women who are at higher than average risk of breast cancer r, increase the frequency of screening and start at an earlier age Strongly agree |
| <b>For women who are at higher than average risk of breast cancer, increase the frequency of screening and start at an earlier age</b> |                                                                                                                                                     |                                                                                                                                                     |                                                                                                                                                              |                                                                                                                                                  |                                                                                                                                                  |
|                                                                                                                                        | For women who are at lower than average risk of breast cancer , start screening at a later age Strongly disagree                                    | For women who are at lower than average risk of breast cancer , start screening at a later age Somewhat disagree                                    | For women who are at lower than average risk of breast cancer , start screening at a later age Neither agree nor disagree                                    | For women who are at lower than average risk of breast cancer , start screening at a later age Somewhat agree                                    | For women who are at lower than average risk of breast cancer , start screening at a later age Strongly agree                                    |
| <b>For women who are at lower than average risk of breast cancer, start screening at a later age</b>                                   |                                                                                                                                                     |                                                                                                                                                     |                                                                                                                                                              |                                                                                                                                                  |                                                                                                                                                  |
|                                                                                                                                        | For women who are at lower than average risk of breast cancer , decrease the                                                                        | For women who are at lower than average risk of breast cancer , decrease the                                                                        | For women who are at lower than average risk of breast cancer , decrease the                                                                                 | For women who are at lower than average risk of breast cancer , decrease the                                                                     | For women who are at lower than average risk of breast cancer , decrease the                                                                     |
| <b>For women who are at lower than average risk of breast cancer, decrease the frequency screening</b>                                 |                                                                                                                                                     |                                                                                                                                                     |                                                                                                                                                              |                                                                                                                                                  |                                                                                                                                                  |

A personalised breast cancer risk assessment aims to offer a more targeted screening approach based on individual risk. Please indicate how strongly you agree or disagree with the following recommendations:

|                                                                                                                              | Strongly disagree                                                                                                            | Somewhat disagree                                                                                                            | Neither agree nor disagree                                                                                                   | Somewhat agree                                                                                                               | Strongly agree                                                                                                               |
|------------------------------------------------------------------------------------------------------------------------------|------------------------------------------------------------------------------------------------------------------------------|------------------------------------------------------------------------------------------------------------------------------|------------------------------------------------------------------------------------------------------------------------------|------------------------------------------------------------------------------------------------------------------------------|------------------------------------------------------------------------------------------------------------------------------|
|                                                                                                                              | frequency screening Strongly disagree                                                                                        | frequency screening Somewhat disagree                                                                                        | frequency screening Neither agree nor disagree                                                                               | frequency screening Somewhat agree                                                                                           | frequency screening Strongly agree                                                                                           |
| For women who are at lower than average risk of breast cancer , decrease the frequency of screening and start at a later age | Strongly disagree                                                                                                            | Somewhat disagree                                                                                                            | Neither agree nor disagree                                                                                                   | Somewhat agree                                                                                                               | Strongly agree                                                                                                               |
|                                                                                                                              | For women who are at lower than average risk of breast cancer , decrease the frequency of screening and start at a later age | For women who are at lower than average risk of breast cancer , decrease the frequency of screening and start at a later age | For women who are at lower than average risk of breast cancer , decrease the frequency of screening and start at a later age | For women who are at lower than average risk of breast cancer , decrease the frequency of screening and start at a later age | For women who are at lower than average risk of breast cancer , decrease the frequency of screening and start at a later age |
|                                                                                                                              | Strongly disagree                                                                                                            | Somewhat disagree                                                                                                            | Neither agree nor disagree                                                                                                   | Somewhat agree                                                                                                               | Strongly agree                                                                                                               |
|                                                                                                                              | For women who are at much lower than average risk of breast cancer , do not offer breast screening                           | For women who are at much lower than average risk of breast cancer , do not offer breast screening                           | For women who are at much lower than average risk of breast cancer , do not offer breast screening                           | For women who are at much lower than average risk of breast cancer , do not offer breast screening                           | For women who are at much lower than average risk of breast cancer , do not offer breast screening                           |
|                                                                                                                              | Strongly disagree                                                                                                            | Somewhat disagree                                                                                                            | Neither agree nor disagree                                                                                                   | Somewhat agree                                                                                                               | Strongly agree                                                                                                               |
|                                                                                                                              | For women who are at much lower than average risk of breast cancer , do not offer breast screening                           | For women who are at much lower than average risk of breast cancer , do not offer breast screening                           | For women who are at much lower than average risk of breast cancer , do not offer breast screening                           | For women who are at much lower than average risk of breast cancer , do not offer breast screening                           | For women who are at much lower than average risk of breast cancer , do not offer breast screening                           |

11. A personalised breast cancer risk assessment combines results for PRS, genetic and non-genetic risk factors to generate a 10-year absolute risk of having breast cancer e.g. 2.5% 10-year risk. Using the sliding scale below, please rate your level of confidence communicating a personalised breast cancer risk assessment result to a patient.

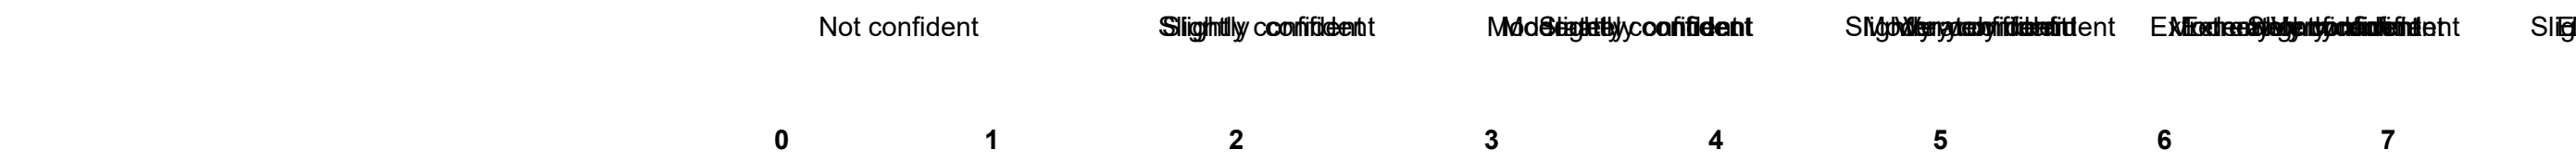



12. Using the sliding scale below, please rate the impact you feel a personalised breast cancer risk assessment would have on your patients.

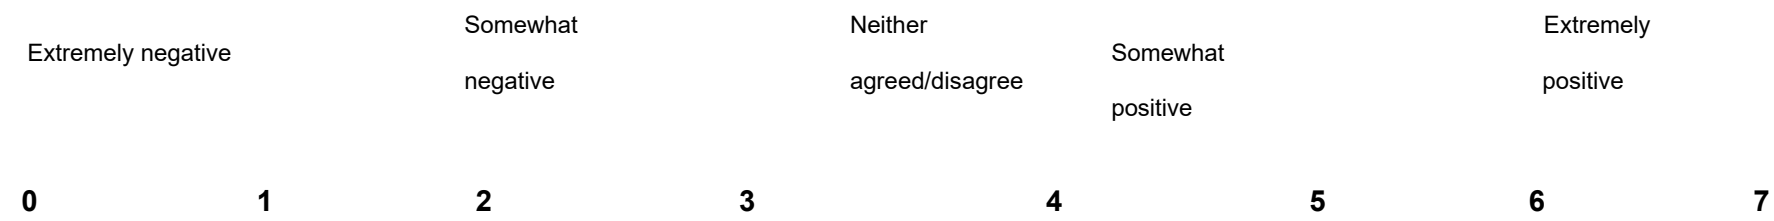

13. Using the sliding scale below, please rate the impact you feel a personalised breast cancer risk assessment would have on your practice.

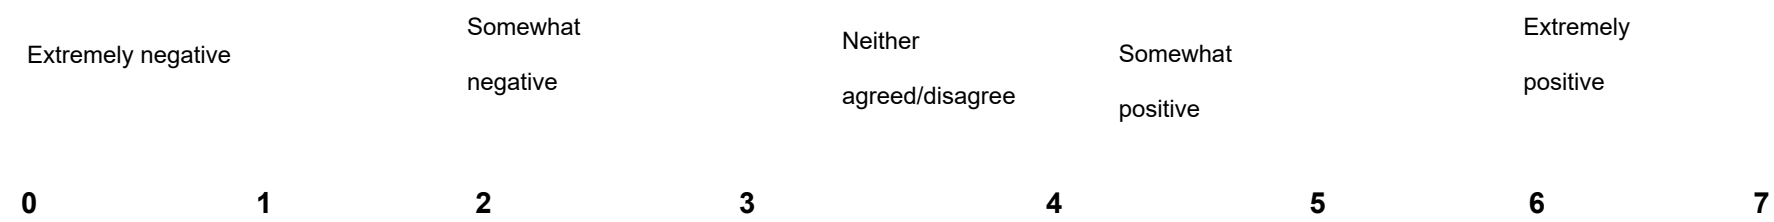

14. In your opinion, what aspects of the NHS should be enhanced to implement breast cancer screening based on a personalised risk assessment? (Check all that apply)

- Number of primary care physicians
- Number of nurse practitioners
- Number of genetic counsellors
- Number of geneticists
- Remuneration of healthcare professionals
- Training of healthcare professionals
- Time allocated to a patient-physician appointment
- Time allocated to a patient-nurse practitioner appointment
- Access to a primary care physician
- Access to a nurse or nurse practitioner
- Access to breast screening (e.g. mammogram, MRI)

- None, I believe the healthcare system is ready
- Other (please specify)

15. What type of information would you like to find in the resources you use in your clinical practice to better understand screening based on personalised risk assessment? (Check all that apply)

- General information on genetics
- Information on common genetic variants (SNPs)
- Information on the basics of personalised breast cancer risk assessment
- Information on the calculation of a polygenic risk score (PRS)
- Information on interpreting results of breast cancer risk assessment
- Information on the best practices of breast cancer risk level communication
- Information on breast cancer prevention
- Information on the main ethical, legal and social challenges of personalised breast risk assessment
- Other (please specify)

16. For learning more about breast cancer screening based on personalised risk assessment, please select the three resource formats you find most useful:

- In-person training such as workshops
- Online courses
- Webinar type conference
- Consultations with a geneticist or a genetic counsellor
- An application for your phone or tablet
- Printed material
- Website
- Other (please specify)

17. Finally, where did you find this questionnaire?

18. If you have any questions, comments or concerns please leave them here:

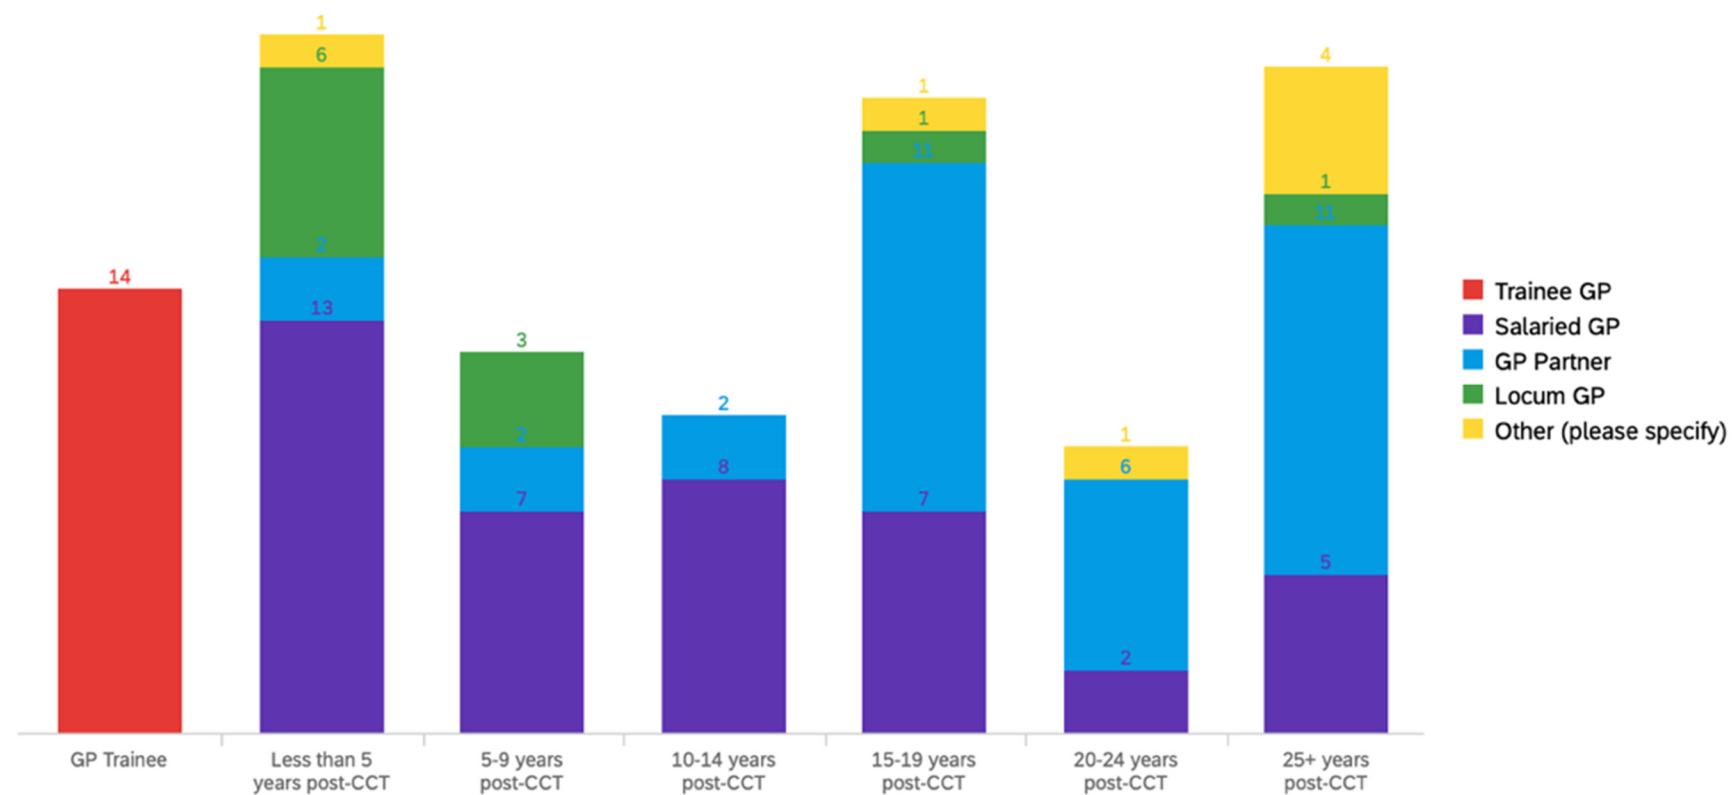

**Figure S1. Stacked bar-chart showing the breakdown of respondents by years of practice and role**

Bars are labelled with the frequency of responses per category.

'Other GPs' were: 4 academic GPs, 1 GP Educator, 1 recently retired GP, 1 GP retainer.

Overall, GP Partners had more years of practice than salaried and locum GPs.

**Table S1. How strongly GPs agree/disagree that the current NHS Breast Screening Programme is an effective method for early detection of breast cancer**

|                        |                       | Total Count (All) | Strongly or somewhat disagree |    | Neither agree nor disagree |    | Somewhat or strongly agree |    | p-value* |
|------------------------|-----------------------|-------------------|-------------------------------|----|----------------------------|----|----------------------------|----|----------|
|                        |                       |                   | N                             | %  | N                          | %  | N                          | %  |          |
| Years of GP experience | Total                 | 108               | 17                            | 16 | 12                         | 11 | 79                         | 73 | 0.09     |
|                        | GP Trainee            | 14                | 2                             | 14 | 3                          | 21 | 9                          | 64 |          |
|                        | 0 - 15 years post-CCT | 44                | 7                             | 16 | 7                          | 16 | 30                         | 68 |          |
|                        | 15+ years post-CCT    | 50                | 8                             | 16 | 2                          | 4  | 40                         | 80 |          |
|                        |                       |                   |                               |    |                            |    |                            |    |          |
| GP Role                | Total                 | 109               | 17                            | 16 | 12                         | 11 | 80                         | 73 | 0.20     |
|                        | Trainee GP            | 14                | 2                             | 14 | 3                          | 21 | 9                          | 64 |          |
|                        | Qualified GP          | 95                | 15                            | 16 | 9                          | 9  | 71                         | 75 |          |
|                        |                       |                   |                               |    |                            |    |                            |    |          |
| Gender                 | Total                 | 105               | 16                            | 15 | 11                         | 10 | 78                         | 74 | 0.01     |
|                        | Male                  | 43                | 3                             | 7  | 8                          | 19 | 32                         | 74 |          |
|                        | Female                | 62                | 13                            | 21 | 3                          | 5  | 46                         | 74 |          |
|                        |                       |                   |                               |    |                            |    |                            |    |          |
| Location of practice   | Total                 | 109               | 17                            | 16 | 12                         | 11 | 80                         | 73 | 0.09     |
|                        | London                | 38                | 3                             | 8  | 6                          | 16 | 29                         | 76 |          |
|                        | Rest of UK            | 71                | 14                            | 20 | 6                          | 8  | 51                         | 72 |          |
|                        |                       |                   |                               |    |                            |    |                            |    |          |
| Ethnicity              | Total                 | 104               | 17                            | 16 | 11                         | 11 | 76                         | 73 | 0.12     |
|                        | White                 | 63                | 13                            | 21 | 5                          | 8  | 45                         | 71 |          |
|                        | Non-white             | 41                | 4                             | 10 | 6                          | 15 | 31                         | 76 |          |

\*Bonferroni corrected p-value <0.003 is considered statistically significant

**Tables S2. How strongly GPs agree/disagree with the following nine targeted screening approaches based on personalised breast cancer risk assessment:**

**1. For women who are at high risk of breast cancer, start screening at an earlier age**

|                        |                       | Total Count (All) | Strongly or somewhat disagree |    | Neither agree nor disagree |    | Somewhat or strongly agree |    | p-value |
|------------------------|-----------------------|-------------------|-------------------------------|----|----------------------------|----|----------------------------|----|---------|
|                        |                       |                   | N                             | %  | N                          | %  | N                          | %  |         |
| Years of GP experience | Total                 | 107               | 9                             | 8  | 12                         | 11 | 86                         | 80 | 0.07    |
|                        | GP Trainee            | 14                | 3                             | 21 | 0                          | 0  | 11                         | 79 |         |
|                        | 0 - 15 years post-CCT | 44                | 3                             | 7  | 7                          | 16 | 34                         | 77 |         |
|                        | 15+ years post-CCT    | 49                | 3                             | 6  | 5                          | 10 | 41                         | 82 |         |
|                        |                       |                   |                               |    |                            |    |                            |    |         |
| GP Role                | Total                 | 107               | 9                             | 8  | 12                         | 11 | 86                         | 79 | 0.04    |
|                        | Trainee GP            | 14                | 3                             | 21 | 0                          | 0  | 11                         | 79 |         |
|                        | Qualified GP          | 93                | 6                             | 6  | 12                         | 13 | 75                         | 79 |         |
|                        |                       |                   |                               |    |                            |    |                            |    |         |
| Gender                 | Total                 | 103               | 9                             | 9  | 11                         | 10 | 83                         | 79 | 0.29    |
|                        | Male                  | 42                | 4                             | 9  | 6                          | 14 | 32                         | 74 |         |
|                        | Female                | 61                | 5                             | 8  | 5                          | 8  | 51                         | 82 |         |
|                        |                       |                   |                               |    |                            |    |                            |    |         |
| Location of practice   | Total                 | 107               | 9                             | 8  | 12                         | 11 | 86                         | 79 | 0.28    |
|                        | London                | 36                | 2                             | 5  | 3                          | 8  | 31                         | 82 |         |
|                        | Rest of UK            | 71                | 7                             | 10 | 9                          | 13 | 55                         | 77 |         |
|                        |                       |                   |                               |    |                            |    |                            |    |         |
| Ethnicity              | Total                 | 102               | 9                             | 9  | 11                         | 11 | 82                         | 79 | 0.09    |
|                        | White                 | 62                | 3                             | 5  | 6                          | 10 | 53                         | 84 |         |
|                        | Non-white             | 40                | 6                             | 15 | 5                          | 12 | 29                         | 71 |         |

2. For women who are at high risk of breast cancer, increase the frequency of screening

|                        |                       | Total Count (All) | Strongly or somewhat disagree |    | Neither agree nor disagree |    | Somewhat or strongly agree |    | p-value |
|------------------------|-----------------------|-------------------|-------------------------------|----|----------------------------|----|----------------------------|----|---------|
|                        |                       |                   | N                             | %  | N                          | %  | N                          | %  |         |
| Years of GP experience | Total                 | 106               | 9                             | 8  | 20                         | 19 | 77                         | 71 | 0.23    |
|                        | GP Trainee            | 13                | 2                             | 14 | 1                          | 7  | 10                         | 71 |         |
|                        | 0 - 15 years post-CCT | 44                | 4                             | 9  | 8                          | 18 | 32                         | 73 |         |
|                        | 15+ years post-CCT    | 49                | 3                             | 6  | 11                         | 22 | 35                         | 70 |         |
|                        |                       |                   |                               |    |                            |    |                            |    |         |
| GP Role                | Total                 | 106               | 9                             | 8  | 20                         | 18 | 77                         | 71 | 0.20    |
|                        | Trainee GP            | 13                | 2                             | 14 | 1                          | 7  | 10                         | 71 |         |
|                        | Qualified GP          | 93                | 7                             | 7  | 19                         | 20 | 67                         | 71 |         |
|                        |                       |                   |                               |    |                            |    |                            |    |         |
| Gender                 | Total                 | 102               | 9                             | 9  | 18                         | 17 | 75                         | 71 | 0.46    |
|                        | Male                  | 42                | 4                             | 9  | 8                          | 19 | 30                         | 70 |         |
|                        | Female                | 60                | 5                             | 8  | 10                         | 16 | 45                         | 73 |         |
|                        |                       |                   |                               |    |                            |    |                            |    |         |
| Location of practice   | Total                 | 106               | 9                             | 8  | 20                         | 18 | 77                         | 71 | 0.35    |
|                        | London                | 35                | 2                             | 5  | 6                          | 16 | 27                         | 71 |         |
|                        | Rest of UK            | 71                | 7                             | 10 | 14                         | 20 | 50                         | 70 |         |
|                        |                       |                   |                               |    |                            |    |                            |    |         |
| Ethnicity              | Total                 | 101               | 9                             | 9  | 19                         | 18 | 73                         | 70 | 0.09    |
|                        | White                 | 62                | 3                             | 5  | 13                         | 21 | 46                         | 73 |         |
|                        | Non-white             | 39                | 6                             | 15 | 6                          | 15 | 27                         | 66 |         |

3. For women who are at high risk of breast cancer, increase the frequency of screening and start at an earlier age

|                        |                       | Total Count (All) | Strongly or somewhat disagree |    | Neither agree nor disagree |    | Somewhat or strongly agree |    | p-value |
|------------------------|-----------------------|-------------------|-------------------------------|----|----------------------------|----|----------------------------|----|---------|
|                        |                       |                   | N                             | %  | N                          | %  | N                          | %  |         |
| Years of GP experience | Total                 | 107               | 8                             | 7  | 19                         | 18 | 80                         | 74 | 0.20    |
|                        | GP Trainee            | 14                | 2                             | 14 | 1                          | 7  | 11                         | 79 |         |
|                        | 0 - 15 years post-CCT | 44                | 3                             | 7  | 7                          | 16 | 34                         | 77 |         |
|                        | 15+ years post-CCT    | 49                | 3                             | 6  | 11                         | 22 | 35                         | 70 |         |
|                        |                       |                   |                               |    |                            |    |                            |    |         |
| GP Role                | Total                 | 107               | 8                             | 7  | 19                         | 17 | 80                         | 73 | 0.18    |
|                        | Trainee GP            | 14                | 2                             | 14 | 1                          | 7  | 11                         | 79 |         |
|                        | Qualified GP          | 93                | 6                             | 6  | 18                         | 19 | 69                         | 73 |         |
|                        |                       |                   |                               |    |                            |    |                            |    |         |
| Gender                 | Total                 | 103               | 8                             | 8  | 18                         | 17 | 77                         | 73 | 0.19    |
|                        | Male                  | 42                | 5                             | 12 | 8                          | 19 | 29                         | 67 |         |
|                        | Female                | 61                | 3                             | 5  | 10                         | 16 | 48                         | 77 |         |
|                        |                       |                   |                               |    |                            |    |                            |    |         |
| Location of practice   | Total                 | 107               | 8                             | 7  | 19                         | 17 | 80                         | 73 | 0.42    |
|                        | London                | 36                | 2                             | 5  | 6                          | 16 | 28                         | 74 |         |
|                        | Rest of UK            | 71                | 6                             | 8  | 13                         | 18 | 52                         | 73 |         |
|                        |                       |                   |                               |    |                            |    |                            |    |         |
| Ethnicity              | Total                 | 102               | 8                             | 8  | 17                         | 16 | 77                         | 74 | 0.17    |
|                        | White                 | 62                | 3                             | 5  | 10                         | 16 | 49                         | 78 |         |
|                        | Non-white             | 40                | 5                             | 12 | 7                          | 17 | 28                         | 68 |         |

4. For women who are at higher than average risk of breast cancer, increase the frequency of screening

|                        |                       | Total Count (All) | Strongly or somewhat disagree |    | Neither agree nor disagree |    | Somewhat or strongly agree |    | p-value |
|------------------------|-----------------------|-------------------|-------------------------------|----|----------------------------|----|----------------------------|----|---------|
|                        |                       |                   | N                             | %  | N                          | %  | N                          | %  |         |
| Years of GP experience | Total                 | 104               | 6                             | 6  | 32                         | 30 | 66                         | 61 | 0.11    |
|                        | GP Trainee            | 13                | 1                             | 7  | 1                          | 7  | 11                         | 79 |         |
|                        | 0 - 15 years post-CCT | 43                | 3                             | 7  | 13                         | 30 | 27                         | 61 |         |
|                        | 15+ years post-CCT    | 48                | 2                             | 4  | 18                         | 36 | 28                         | 56 |         |
|                        |                       |                   |                               |    |                            |    |                            |    |         |
| GP Role                | Total                 | 104               | 6                             | 6  | 32                         | 29 | 66                         | 61 | 0.08    |
|                        | Trainee GP            | 13                | 1                             | 7  | 1                          | 7  | 11                         | 79 |         |
|                        | Qualified GP          | 91                | 5                             | 5  | 31                         | 33 | 55                         | 58 |         |
|                        |                       |                   |                               |    |                            |    |                            |    |         |
| Gender                 | Total                 | 100               | 6                             | 6  | 31                         | 30 | 63                         | 60 | 0.21    |
|                        | Male                  | 42                | 2                             | 5  | 16                         | 37 | 24                         | 56 |         |
|                        | Female                | 58                | 4                             | 6  | 15                         | 24 | 39                         | 63 |         |
|                        |                       |                   |                               |    |                            |    |                            |    |         |
| Location of practice   | Total                 | 104               | 6                             | 6  | 32                         | 29 | 66                         | 61 | 0.50    |
|                        | London                | 35                | 2                             | 5  | 11                         | 29 | 22                         | 58 |         |
|                        | Rest of UK            | 69                | 4                             | 6  | 21                         | 30 | 44                         | 62 |         |
|                        |                       |                   |                               |    |                            |    |                            |    |         |
| Ethnicity              | Total                 | 99                | 6                             | 6  | 31                         | 30 | 62                         | 60 | 0.14    |
|                        | White                 | 61                | 2                             | 3  | 21                         | 33 | 38                         | 60 |         |
|                        | Non-white             | 38                | 4                             | 10 | 10                         | 24 | 24                         | 59 |         |



5. For women who are at higher than average risk of breast cancer, increase the frequency of screening and start at an earlier age

|                        |                       | Total Count (All) | Strongly or somewhat disagree |    | Neither agree nor disagree |    | Somewhat or strongly agree |    | p-value |
|------------------------|-----------------------|-------------------|-------------------------------|----|----------------------------|----|----------------------------|----|---------|
|                        |                       |                   | N                             | %  | N                          | %  | N                          | %  |         |
| Years of GP experience | Total                 | 104               | 7                             | 6  | 31                         | 29 | 66                         | 61 | 0.14    |
|                        | GP Trainee            | 13                | 1                             | 7  | 1                          | 7  | 11                         | 79 |         |
|                        | 0 - 15 years post-CCT | 43                | 3                             | 7  | 13                         | 30 | 27                         | 61 |         |
|                        | 15+ years post-CCT    | 48                | 3                             | 6  | 17                         | 34 | 28                         | 56 |         |
|                        |                       |                   |                               |    |                            |    |                            |    |         |
| GP Role                | Total                 | 104               | 7                             | 6  | 31                         | 28 | 66                         | 61 | 0.09    |
|                        | Trainee GP            | 13                | 1                             | 7  | 1                          | 7  | 11                         | 79 |         |
|                        | Qualified GP          | 91                | 6                             | 6  | 30                         | 32 | 55                         | 58 |         |
|                        |                       |                   |                               |    |                            |    |                            |    |         |
| Gender                 | Total                 | 100               | 7                             | 7  | 30                         | 29 | 63                         | 60 | 0.33    |
|                        | Male                  | 42                | 4                             | 9  | 13                         | 30 | 25                         | 58 |         |
|                        | Female                | 58                | 3                             | 5  | 17                         | 27 | 38                         | 61 |         |
|                        |                       |                   |                               |    |                            |    |                            |    |         |
| Location of practice   | Total                 | 104               | 7                             | 6  | 31                         | 28 | 66                         | 61 | 0.44    |
|                        | London                | 36                | 3                             | 8  | 11                         | 29 | 22                         | 58 |         |
|                        | Rest of UK            | 68                | 4                             | 6  | 20                         | 28 | 44                         | 62 |         |
|                        |                       |                   |                               |    |                            |    |                            |    |         |
| Ethnicity              | Total                 | 99                | 7                             | 7  | 30                         | 29 | 62                         | 60 | 0.25    |
|                        | White                 | 60                | 3                             | 5  | 20                         | 32 | 37                         | 59 |         |
|                        | Non-white             | 39                | 4                             | 10 | 10                         | 24 | 25                         | 61 |         |

6. For women who are at lower than average risk of breast cancer, start screening at a later age

|                        |                       | Total Count (All) | Strongly or somewhat disagree |    | Neither agree nor disagree |    | Somewhat or strongly agree |    | p-value |
|------------------------|-----------------------|-------------------|-------------------------------|----|----------------------------|----|----------------------------|----|---------|
|                        |                       |                   | N                             | %  | N                          | %  | N                          | %  |         |
| Years of GP experience | Total                 | 104               | 43                            | 40 | 41                         | 38 | 20                         | 19 | 0.22    |
|                        | GP Trainee            | 14                | 6                             | 43 | 4                          | 29 | 4                          | 29 |         |
|                        | 0 - 15 years post-CCT | 43                | 20                            | 45 | 17                         | 39 | 6                          | 14 |         |
|                        | 15+ years post-CCT    | 47                | 17                            | 34 | 20                         | 40 | 10                         | 20 |         |
|                        |                       |                   |                               |    |                            |    |                            |    |         |
| GP Role                | Total                 | 104               | 43                            | 39 | 41                         | 38 | 20                         | 18 | 0.27    |
|                        | Trainee GP            | 14                | 6                             | 43 | 4                          | 29 | 4                          | 29 |         |
|                        | Qualified GP          | 90                | 37                            | 39 | 37                         | 39 | 16                         | 17 |         |
|                        |                       |                   |                               |    |                            |    |                            |    |         |
| Gender                 | Total                 | 100               | 41                            | 39 | 40                         | 38 | 19                         | 18 | 0.32    |
|                        | Male                  | 42                | 15                            | 35 | 18                         | 42 | 9                          | 21 |         |
|                        | Female                | 58                | 26                            | 42 | 22                         | 35 | 10                         | 16 |         |
|                        |                       |                   |                               |    |                            |    |                            |    |         |
| Location of practice   | Total                 | 104               | 43                            | 39 | 41                         | 38 | 20                         | 18 | 0.13    |
|                        | London                | 36                | 15                            | 39 | 17                         | 45 | 4                          | 11 |         |
|                        | Rest of UK            | 68                | 28                            | 39 | 24                         | 34 | 16                         | 23 |         |
|                        |                       |                   |                               |    |                            |    |                            |    |         |
| Ethnicity              | Total                 | 99                | 41                            | 39 | 38                         | 37 | 20                         | 19 | 0.14    |
|                        | White                 | 60                | 22                            | 35 | 23                         | 37 | 15                         | 24 |         |
|                        | Non-white             | 39                | 19                            | 46 | 15                         | 37 | 5                          | 12 |         |

7. For women who are at lower than average risk of breast cancer, decrease the frequency screening

|                        |                       | Total Count (All) | Strongly or somewhat disagree |    | Neither agree nor disagree |    | Somewhat or strongly agree |    | p-value |
|------------------------|-----------------------|-------------------|-------------------------------|----|----------------------------|----|----------------------------|----|---------|
|                        |                       |                   | N                             | %  | N                          | %  | N                          | %  |         |
| Years of GP experience | Total                 | 104               | 35                            | 32 | 46                         | 43 | 23                         | 21 | 0.13    |
|                        | GP Trainee            | 14                | 5                             | 36 | 4                          | 29 | 5                          | 36 |         |
|                        | 0 - 15 years post-CCT | 43                | 16                            | 36 | 21                         | 48 | 6                          | 14 |         |
|                        | 15+ years post-CCT    | 47                | 14                            | 28 | 21                         | 42 | 12                         | 24 |         |
|                        |                       |                   |                               |    |                            |    |                            |    |         |
| GP Role                | Total                 | 104               | 35                            | 32 | 46                         | 42 | 23                         | 21 | 0.16    |
|                        | Trainee GP            | 14                | 5                             | 36 | 4                          | 29 | 5                          | 36 |         |
|                        | Qualified GP          | 90                | 30                            | 32 | 42                         | 44 | 18                         | 19 |         |
|                        |                       |                   |                               |    |                            |    |                            |    |         |
| Gender                 | Total                 | 100               | 33                            | 31 | 45                         | 43 | 22                         | 21 | 0.05    |
|                        | Male                  | 42                | 9                             | 21 | 23                         | 53 | 10                         | 23 |         |
|                        | Female                | 58                | 24                            | 39 | 22                         | 35 | 12                         | 19 |         |
|                        |                       |                   |                               |    |                            |    |                            |    |         |
| Location of practice   | Total                 | 104               | 35                            | 32 | 46                         | 42 | 23                         | 21 | 0.07    |
|                        | London                | 36                | 14                            | 37 | 18                         | 47 | 4                          | 11 |         |
|                        | Rest of UK            | 68                | 21                            | 30 | 28                         | 39 | 19                         | 27 |         |
|                        |                       |                   |                               |    |                            |    |                            |    |         |
| Ethnicity              | Total                 | 99                | 33                            | 32 | 43                         | 41 | 23                         | 22 | 0.07    |
|                        | White                 | 60                | 19                            | 30 | 23                         | 37 | 18                         | 29 |         |
|                        | Non-white             | 39                | 14                            | 34 | 20                         | 49 | 5                          | 12 |         |

8. For women who are at lower than average risk of breast cancer, decrease the frequency of screening and start at a later age

|                        |                       | Total Count (All) | Strongly or somewhat disagree |    | Neither agree nor disagree |    | Somewhat or strongly agree |    | p-value |
|------------------------|-----------------------|-------------------|-------------------------------|----|----------------------------|----|----------------------------|----|---------|
|                        |                       |                   | N                             | %  | N                          | %  | N                          | %  |         |
| Years of GP experience | Total                 | 105               | 41                            | 38 | 45                         | 42 | 19                         | 18 | 0.12    |
|                        | GP Trainee            | 14                | 5                             | 36 | 4                          | 29 | 5                          | 36 |         |
|                        | 0 - 15 years post-CCT | 43                | 18                            | 41 | 20                         | 45 | 5                          | 11 |         |
|                        | 15+ years post-CCT    | 48                | 18                            | 36 | 21                         | 42 | 9                          | 18 |         |
|                        |                       |                   |                               |    |                            |    |                            |    |         |
| GP Role                | Total                 | 105               | 41                            | 38 | 45                         | 41 | 19                         | 17 | 0.08    |
|                        | Trainee GP            | 14                | 5                             | 36 | 4                          | 29 | 5                          | 36 |         |
|                        | Qualified GP          | 91                | 36                            | 38 | 41                         | 43 | 14                         | 15 |         |
|                        |                       |                   |                               |    |                            |    |                            |    |         |
| Gender                 | Total                 | 101               | 39                            | 37 | 44                         | 42 | 18                         | 17 | 0.33    |
|                        | Male                  | 42                | 14                            | 33 | 20                         | 47 | 8                          | 19 |         |
|                        | Female                | 59                | 25                            | 40 | 24                         | 39 | 10                         | 16 |         |
|                        |                       |                   |                               |    |                            |    |                            |    |         |
| Location of practice   | Total                 | 105               | 41                            | 38 | 45                         | 41 | 19                         | 17 | 0.08    |
|                        | London                | 36                | 15                            | 39 | 18                         | 47 | 3                          | 8  |         |
|                        | Rest of UK            | 69                | 26                            | 37 | 27                         | 38 | 16                         | 23 |         |
|                        |                       |                   |                               |    |                            |    |                            |    |         |
| Ethnicity              | Total                 | 100               | 39                            | 38 | 42                         | 40 | 19                         | 18 | 0.09    |
|                        | White                 | 61                | 23                            | 37 | 23                         | 37 | 15                         | 24 |         |
|                        | Non-white             | 39                | 16                            | 39 | 19                         | 46 | 4                          | 10 |         |

9. For women who are at much lower than average risk of breast cancer, do not offer breast screening

|                        |                       | Total Count (All) | Strongly or somewhat disagree |    | Neither agree nor disagree |    | Somewhat or strongly agree |    | p-value |
|------------------------|-----------------------|-------------------|-------------------------------|----|----------------------------|----|----------------------------|----|---------|
|                        |                       |                   | N                             | %  | N                          | %  | N                          | %  |         |
| Years of GP experience | Total                 | 105               | 57                            | 53 | 37                         | 34 | 11                         | 10 | 0.05    |
|                        | GP Trainee            | 14                | 7                             | 50 | 3                          | 21 | 4                          | 29 |         |
|                        | 0 - 15 years post-CCT | 43                | 26                            | 59 | 14                         | 32 | 3                          | 7  |         |
|                        | 15+ years post-CCT    | 48                | 24                            | 48 | 20                         | 40 | 4                          | 8  |         |
|                        |                       |                   |                               |    |                            |    |                            |    |         |
| GP Role                | Total                 | 105               | 57                            | 52 | 37                         | 34 | 11                         | 10 | 0.03    |
|                        | Trainee GP            | 14                | 7                             | 50 | 3                          | 21 | 4                          | 29 |         |
|                        | Qualified GP          | 91                | 50                            | 53 | 34                         | 36 | 7                          | 7  |         |
|                        |                       |                   |                               |    |                            |    |                            |    |         |
| Gender                 | Total                 | 101               | 56                            | 53 | 34                         | 32 | 11                         | 10 | 0.43    |
|                        | Male                  | 42                | 22                            | 51 | 15                         | 35 | 5                          | 12 |         |
|                        | Female                | 59                | 34                            | 55 | 19                         | 31 | 6                          | 10 |         |
|                        |                       |                   |                               |    |                            |    |                            |    |         |
| Location of practice   | Total                 | 105               | 57                            | 52 | 37                         | 34 | 11                         | 10 | 0.24    |
|                        | London                | 36                | 21                            | 55 | 13                         | 34 | 2                          | 5  |         |
|                        | Rest of UK            | 69                | 36                            | 51 | 24                         | 34 | 9                          | 13 |         |
|                        |                       |                   |                               |    |                            |    |                            |    |         |
| Ethnicity              | Total                 | 100               | 55                            | 53 | 34                         | 33 | 11                         | 11 | 0.14    |
|                        | White                 | 61                | 31                            | 49 | 21                         | 33 | 9                          | 14 |         |
|                        | Non-white             | 39                | 24                            | 59 | 13                         | 32 | 2                          | 5  |         |

**Table S3. Self-reported familiarity with PRS**

|                        |                       | Total Count (All) | Not familiar (0-1) |    | Slightly to moderately familiar (2-4) |    | Very to extremely familiar (5-7) |    | p-value |
|------------------------|-----------------------|-------------------|--------------------|----|---------------------------------------|----|----------------------------------|----|---------|
|                        |                       |                   | N                  | %  | N                                     | %  | N                                | %  |         |
| Years of GP experience | Total                 | 91                | 44                 | 41 | 38                                    | 35 | 9                                | 8  | 0.26    |
|                        | GP Trainee            | 9                 | 5                  | 36 | 3                                     | 21 | 1                                | 7  |         |
|                        | 0 - 15 years post-CCT | 36                | 19                 | 43 | 15                                    | 34 | 2                                | 5  |         |
|                        | 15+ years post-CCT    | 46                | 20                 | 40 | 20                                    | 40 | 6                                | 12 |         |
|                        |                       |                   |                    |    |                                       |    |                                  |    |         |
| GP Role                | Total                 | 92                | 45                 | 41 | 38                                    | 35 | 9                                | 8  | 0.44    |
|                        | Trainee GP            | 9                 | 5                  | 36 | 3                                     | 21 | 1                                | 7  |         |
|                        | Qualified GP          | 83                | 40                 | 42 | 35                                    | 37 | 8                                | 8  |         |
|                        |                       |                   |                    |    |                                       |    |                                  |    |         |
| Gender                 | Total                 | 88                | 43                 | 41 | 36                                    | 34 | 9                                | 9  | 0.25    |
|                        | Male                  | 40                | 17                 | 40 | 19                                    | 44 | 4                                | 9  |         |
|                        | Female                | 48                | 26                 | 42 | 17                                    | 27 | 5                                | 8  |         |
|                        |                       |                   |                    |    |                                       |    |                                  |    |         |
| Location of practice   | Total                 | 92                | 45                 | 41 | 38                                    | 35 | 9                                | 8  | 0.35    |
|                        | London                | 31                | 17                 | 45 | 11                                    | 29 | 3                                | 8  |         |
|                        | Rest of UK            | 61                | 28                 | 39 | 27                                    | 38 | 6                                | 8  |         |
|                        |                       |                   |                    |    |                                       |    |                                  |    |         |
| Ethnicity              | Total                 | 87                | 41                 | 39 | 37                                    | 36 | 9                                | 9  | 0.47    |
|                        | White                 | 50                | 23                 | 37 | 22                                    | 35 | 5                                | 8  |         |
|                        | Non-white             | 37                | 18                 | 44 | 15                                    | 37 | 4                                | 10 |         |

**Table S4. Self-reported confidence communicating the difference between a polygenic and monogenic condition to a patient**

|                        |                       | Total Count (All) | Not confident (0-1) |    | Slightly to moderately confident (2-4) |    | Very to extremely confident (5-7) |    | p-value |
|------------------------|-----------------------|-------------------|---------------------|----|----------------------------------------|----|-----------------------------------|----|---------|
|                        |                       |                   | N                   | %  | N                                      | %  | N                                 | %  |         |
| Years of GP experience | Total                 | 101               | 22                  | 20 | 57                                     | 53 | 22                                | 20 | 0.04    |
|                        | GP Trainee            | 12                | 1                   | 7  | 9                                      | 64 | 2                                 | 14 |         |
|                        | 0 - 15 years post-CCT | 41                | 6                   | 14 | 27                                     | 61 | 8                                 | 18 |         |
|                        | 15+ years post-CCT    | 48                | 15                  | 30 | 21                                     | 42 | 12                                | 24 |         |
|                        |                       |                   |                     |    |                                        |    |                                   |    |         |
| GP Role                | Total                 | 102               | 23                  | 21 | 57                                     | 52 | 22                                | 20 | 0.16    |
|                        | Trainee GP            | 12                | 1                   | 7  | 9                                      | 64 | 2                                 | 14 |         |
|                        | Qualified GP          | 90                | 22                  | 23 | 48                                     | 51 | 20                                | 21 |         |
|                        |                       |                   |                     |    |                                        |    |                                   |    |         |
| Gender                 | Total                 | 98                | 22                  | 21 | 55                                     | 52 | 21                                | 20 | 0.45    |
|                        | Male                  | 41                | 10                  | 23 | 22                                     | 51 | 9                                 | 21 |         |
|                        | Female                | 57                | 12                  | 19 | 33                                     | 53 | 12                                | 19 |         |
|                        |                       |                   |                     |    |                                        |    |                                   |    |         |
| Location of practice   | Total                 | 102               | 23                  | 21 | 57                                     | 52 | 22                                | 20 | 0.29    |
|                        | London                | 35                | 7                   | 18 | 22                                     | 58 | 6                                 | 16 |         |
|                        | Rest of UK            | 67                | 16                  | 23 | 35                                     | 49 | 16                                | 23 |         |
|                        |                       |                   |                     |    |                                        |    |                                   |    |         |
| Ethnicity              | Total                 | 97                | 22                  | 21 | 55                                     | 53 | 20                                | 19 | 0.27    |
|                        | White                 | 59                | 14                  | 22 | 31                                     | 49 | 14                                | 22 |         |
|                        | Non-white             | 38                | 8                   | 20 | 24                                     | 59 | 6                                 | 15 |         |

**Table S5: Self-reported confidence communicating the advantages and disadvantages of a personalised breast cancer risk assessment incorporating PRS to a patient**

|                        |                       | Total Count (All) | Not confident (0-1) |    | Slightly to moderately confident (2-4) |    | Very to extremely confident (5-7) |    | p-value |
|------------------------|-----------------------|-------------------|---------------------|----|----------------------------------------|----|-----------------------------------|----|---------|
|                        |                       |                   | N                   | %  | N                                      | %  | N                                 | %  |         |
| Years of GP experience | Total                 | 93                | 39                  | 36 | 45                                     | 42 | 9                                 | 8  | 0.20    |
|                        | GP Trainee            | 11                | 4                   | 29 | 6                                      | 43 | 1                                 | 7  |         |
|                        | 0 - 15 years post-CCT | 39                | 20                  | 45 | 15                                     | 34 | 4                                 | 9  |         |
|                        | 15+ years post-CCT    | 43                | 15                  | 30 | 24                                     | 48 | 4                                 | 8  |         |
|                        |                       |                   |                     |    |                                        |    |                                   |    |         |
| GP Role                | Total                 | 94                | 40                  | 37 | 45                                     | 41 | 9                                 | 8  | 0.45    |
|                        | Trainee GP            | 11                | 4                   | 29 | 6                                      | 43 | 1                                 | 7  |         |
|                        | Qualified GP          | 83                | 36                  | 38 | 39                                     | 41 | 8                                 | 8  |         |
|                        |                       |                   |                     |    |                                        |    |                                   |    |         |
| Gender                 | Total                 | 90                | 37                  | 35 | 45                                     | 43 | 8                                 | 8  | 0.35    |
|                        | Male                  | 38                | 14                  | 33 | 21                                     | 49 | 3                                 | 7  |         |
|                        | Female                | 52                | 23                  | 37 | 24                                     | 39 | 5                                 | 8  |         |
|                        |                       |                   |                     |    |                                        |    |                                   |    |         |
| Location of practice   | Total                 | 94                | 40                  | 37 | 45                                     | 41 | 9                                 | 8  | 0.03    |
|                        | London                | 32                | 19                  | 50 | 11                                     | 29 | 2                                 | 5  |         |
|                        | Rest of UK            | 62                | 21                  | 30 | 34                                     | 48 | 7                                 | 10 |         |
|                        |                       |                   |                     |    |                                        |    |                                   |    |         |
| Ethnicity              | Total                 | 89                | 37                  | 36 | 43                                     | 41 | 9                                 | 9  | 0.46    |
|                        | White                 | 52                | 21                  | 33 | 26                                     | 41 | 5                                 | 8  |         |
|                        | Non-white             | 37                | 16                  | 39 | 17                                     | 41 | 4                                 | 10 |         |



**Table S6. Self-reported confidence communicating a personalised breast cancer risk assessment result as a 10 year absolute risk to a patient**

|                        |                       | Total Count (All) | Not confident (0-1) |    | Slightly to moderately confident (2-4) |    | Very to extremely confident (5-7) |    | p-value |
|------------------------|-----------------------|-------------------|---------------------|----|----------------------------------------|----|-----------------------------------|----|---------|
|                        |                       |                   | N                   | %  | N                                      | %  | N                                 | %  |         |
| Years of GP experience | Total                 | 105               | 33                  | 31 | 50                                     | 46 | 22                                | 20 | 0.33    |
|                        | GP Trainee            | 13                | 4                   | 29 | 6                                      | 43 | 3                                 | 21 |         |
|                        | 0 - 15 years post-CCT | 44                | 14                  | 32 | 21                                     | 48 | 9                                 | 20 |         |
|                        | 15+ years post-CCT    | 48                | 15                  | 30 | 23                                     | 46 | 10                                | 20 |         |
|                        |                       |                   |                     |    |                                        |    |                                   |    |         |
| GP Role                | Total                 | 105               | 33                  | 30 | 50                                     | 46 | 22                                | 20 | 0.49    |
|                        | Trainee GP            | 13                | 4                   | 29 | 6                                      | 43 | 3                                 | 21 |         |
|                        | Qualified GP          | 92                | 29                  | 31 | 44                                     | 46 | 19                                | 20 |         |
|                        |                       |                   |                     |    |                                        |    |                                   |    |         |
| Gender                 | Total                 | 101               | 31                  | 30 | 49                                     | 47 | 21                                | 20 | 0.37    |
|                        | Male                  | 41                | 14                  | 33 | 18                                     | 42 | 9                                 | 21 |         |
|                        | Female                | 60                | 17                  | 27 | 31                                     | 50 | 12                                | 19 |         |
|                        |                       |                   |                     |    |                                        |    |                                   |    |         |
| Location of practice   | Total                 | 105               | 33                  | 30 | 50                                     | 46 | 22                                | 20 | 0.25    |
|                        | London                | 37                | 14                  | 37 | 17                                     | 45 | 6                                 | 16 |         |
|                        | Rest of UK            | 68                | 19                  | 27 | 33                                     | 46 | 16                                | 23 |         |
|                        |                       |                   |                     |    |                                        |    |                                   |    |         |
| Ethnicity              | Total                 | 100               | 30                  | 29 | 49                                     | 47 | 21                                | 20 | 0.24    |
|                        | White                 | 60                | 17                  | 27 | 28                                     | 44 | 15                                | 24 |         |
|                        | Non-white             | 40                | 13                  | 32 | 21                                     | 51 | 6                                 | 15 |         |

**Table S7. Perception of impact of personalised breast cancer risk assessment on patients**

|                        |                       | Total Count<br>(All) | Extremely negative (0-1) |   | Somewhat negative (2-3) |    | Somewhat positive (4-5) |    | Extremely positive (6-7) |    | p-value |
|------------------------|-----------------------|----------------------|--------------------------|---|-------------------------|----|-------------------------|----|--------------------------|----|---------|
|                        |                       |                      | N                        | % | N                       | %  | N                       | %  | N                        | %  |         |
| Years of GP experience | Total                 | 106                  | 5                        | 5 | 15                      | 14 | 70                      | 65 | 16                       | 15 | 0.32    |
|                        | GP Trainee            | 13                   | 1                        | 7 | 1                       | 7  | 9                       | 64 | 2                        | 14 |         |
|                        | 0 - 15 years post-CCT | 44                   | 2                        | 5 | 8                       | 18 | 28                      | 64 | 6                        | 14 |         |
|                        | 15+ years post-CCT    | 49                   | 2                        | 4 | 6                       | 12 | 33                      | 66 | 8                        | 16 |         |
|                        |                       |                      |                          |   |                         |    |                         |    |                          |    |         |
| GP Role                | Total                 | 106                  | 5                        | 5 | 15                      | 14 | 70                      | 64 | 16                       | 15 | 0.43    |
|                        | Trainee GP            | 13                   | 1                        | 7 | 1                       | 7  | 9                       | 64 | 2                        | 14 |         |
|                        | Qualified GP          | 93                   | 4                        | 4 | 14                      | 15 | 61                      | 64 | 14                       | 15 |         |
|                        |                       |                      |                          |   |                         |    |                         |    |                          |    |         |
| Gender                 | Total                 | 102                  | 4                        | 4 | 14                      | 13 | 68                      | 65 | 16                       | 15 | 0.08    |
|                        | Male                  | 42                   | 0                        | 0 | 4                       | 9  | 29                      | 67 | 9                        | 21 |         |
|                        | Female                | 60                   | 4                        | 6 | 10                      | 16 | 39                      | 63 | 7                        | 11 |         |
|                        |                       |                      |                          |   |                         |    |                         |    |                          |    |         |
| Location of practice   | Total                 | 106                  | 5                        | 5 | 15                      | 14 | 70                      | 64 | 16                       | 15 | 0.15    |
|                        | London                | 36                   | 0                        | 0 | 4                       | 11 | 27                      | 71 | 5                        | 13 |         |
|                        | Rest of UK            | 70                   | 5                        | 7 | 11                      | 15 | 43                      | 61 | 11                       | 15 |         |
|                        |                       |                      |                          |   |                         |    |                         |    |                          |    |         |
| Ethnicity              | Total                 | 101                  | 4                        | 4 | 14                      | 13 | 67                      | 64 | 16                       | 15 | 0.06    |
|                        | White                 | 62                   | 3                        | 5 | 11                      | 17 | 42                      | 67 | 6                        | 10 |         |
|                        | Non-white             | 39                   | 1                        | 2 | 3                       | 7  | 25                      | 61 | 10                       | 24 |         |

**Table S8. Using the sliding scale below, please rate the impact you feel a personalised breast cancer risk assessment would have on your practice**

|                        |                       |                   | Extremely negative (0-1) |   | Somewhat negative (2-3) |    | Somewhat positive (4-5) |    | Extremely positive (6-7) |    | p-value |
|------------------------|-----------------------|-------------------|--------------------------|---|-------------------------|----|-------------------------|----|--------------------------|----|---------|
|                        |                       | Total Count (All) | N                        | % | N                       | %  | N                       | %  | N                        | %  |         |
| Years of GP experience | <b>Total</b>          | 105               | 6                        | 6 | 34                      | 31 | 59                      | 55 | 6                        | 6  | 0.10    |
|                        | GP Trainee            | 13                | 0                        | 0 | 3                       | 21 | 10                      | 71 | 0                        | 0  |         |
|                        | 0 - 15 years post-CCT | 44                | 3                        | 7 | 19                      | 43 | 20                      | 45 | 2                        | 5  |         |
|                        | 15+ years post-CCT    | 48                | 3                        | 6 | 12                      | 24 | 29                      | 58 | 4                        | 8  |         |
|                        |                       |                   |                          |   |                         |    |                         |    |                          |    |         |
| GP Role                | <b>Total</b>          | 105               | 6                        | 6 | 34                      | 31 | 59                      | 54 | 6                        | 6  | 0.18    |
|                        | Trainee GP            | 13                | 0                        | 0 | 3                       | 21 | 10                      | 71 | 0                        | 0  |         |
|                        | Qualified GP          | 92                | 6                        | 6 | 31                      | 33 | 49                      | 52 | 6                        | 6  |         |
|                        |                       |                   |                          |   |                         |    |                         |    |                          |    |         |
| Gender                 | <b>Total</b>          | 101               | 5                        | 5 | 33                      | 31 | 57                      | 54 | 6                        | 6  | 0.36    |
|                        | Male                  | 42                | 1                        | 2 | 15                      | 35 | 24                      | 56 | 2                        | 5  |         |
|                        | Female                | 59                | 4                        | 6 | 18                      | 29 | 33                      | 53 | 4                        | 6  |         |
|                        |                       |                   |                          |   |                         |    |                         |    |                          |    |         |
| Location of practice   | <b>Total</b>          | 105               | 6                        | 6 | 34                      | 31 | 59                      | 54 | 6                        | 6  | 0.06    |
|                        | London                | 36                | 0                        | 0 | 12                      | 32 | 20                      | 53 | 4                        | 11 |         |
|                        | Rest of UK            | 69                | 6                        | 8 | 22                      | 31 | 39                      | 55 | 2                        | 3  |         |
|                        |                       |                   |                          |   |                         |    |                         |    |                          |    |         |
| Ethnicity              | <b>Total</b>          | 100               | 5                        | 5 | 32                      | 31 | 57                      | 55 | 6                        | 6  | 0.14    |
|                        | White                 | 61                | 5                        | 8 | 18                      | 29 | 35                      | 56 | 3                        | 5  |         |
|                        | Non-white             | 39                | 0                        | 0 | 14                      | 34 | 22                      | 54 | 3                        | 7  |         |

**Table S9. Categorisations used in questions about knowledge and attitudes**

|                                                                                                                                 |                                                                                                                                                                                                                                                         |
|---------------------------------------------------------------------------------------------------------------------------------|---------------------------------------------------------------------------------------------------------------------------------------------------------------------------------------------------------------------------------------------------------|
| <b>Sliding scale groups for the four questions assessing knowledge</b>                                                          | <ul style="list-style-type: none"><li>• 0 – 1 ‘Not familiar’ / ‘Not confident’</li><li>• 2 – 4 ‘Slight to moderately familiar’ / ‘Slight to moderately confident’</li><li>• 5 – 7 ‘Very or extremely familiar’/ ‘Very or extremely confident’</li></ul> |
| <b>Sliding scale groups for the two questions assessing impact</b>                                                              | <ul style="list-style-type: none"><li>• 0 – 1 ‘Extremely negative’</li><li>• 2 – 3 ‘Somewhat negative’</li><li>• 4 – 5 ‘Somewhat positive’</li><li>• 6 – 7 ‘Extremely positive’</li></ul>                                                               |
| <b>Likert-scale groups for the two questions about views on NHSBSP and future risk-stratified targeted screening approaches</b> | <ul style="list-style-type: none"><li>• ‘Strongly agree or somewhat agree’</li><li>• ‘Neither agree nor disagree’</li><li>• ‘Strongly disagree or somewhat disagree’</li></ul>                                                                          |

**Table S10. Categorisations used in questions about respondents’ professional and sociodemographic characteristics**

|                             |                                                                                                                                   |
|-----------------------------|-----------------------------------------------------------------------------------------------------------------------------------|
| <b>Years of practice</b>    | <ul style="list-style-type: none"><li>• ‘GP Trainee’</li><li>• 0 – 15 years post-CCT</li><li>• ‘15+ years post-CCT’</li></ul>     |
| <b>GP role</b>              | <ul style="list-style-type: none"><li>• ‘GP Trainee’</li><li>• ‘GP Partner’</li><li>• ‘Salaried’, ‘Locum’ or ‘Other GP’</li></ul> |
| <b>Location of practice</b> | <ul style="list-style-type: none"><li>• ‘London’</li><li>• ‘Rest of UK’</li></ul>                                                 |
| <b>Gender</b>               | <ul style="list-style-type: none"><li>• ‘Male’</li><li>• ‘Female’</li></ul>                                                       |
| <b>Ethnicity</b>            | <ul style="list-style-type: none"><li>• ‘White’</li><li>• ‘non-White’</li></ul>                                                   |

\*CCT = post-completion of GP Training
